# Supplementary material
Source: Springer Nature journal article supplement (https://www.springermedizin.de/resource/supplementary/12874_2012_872_MOESM3_ESM.pdf/9432674)

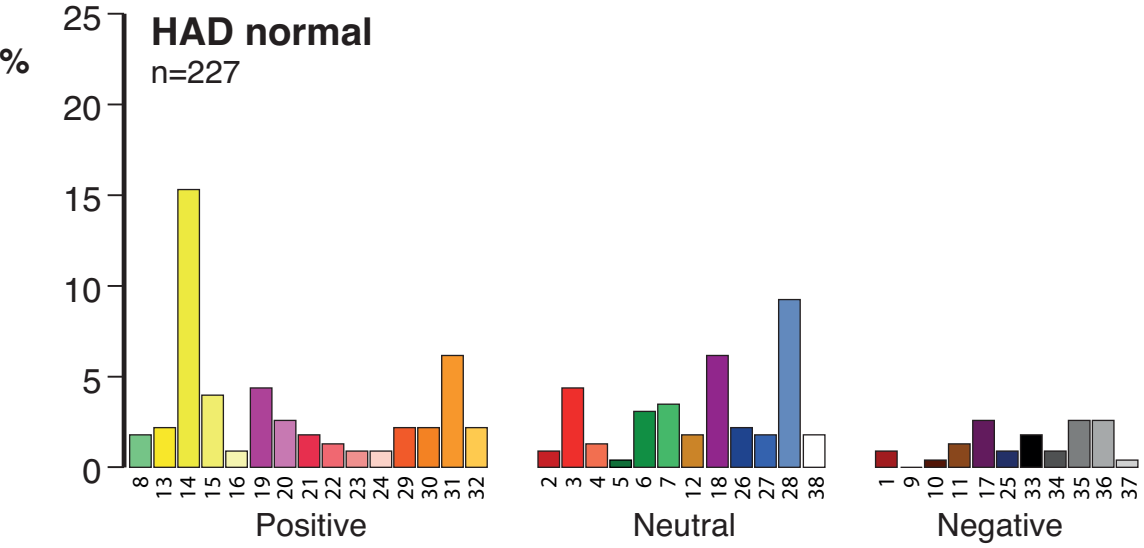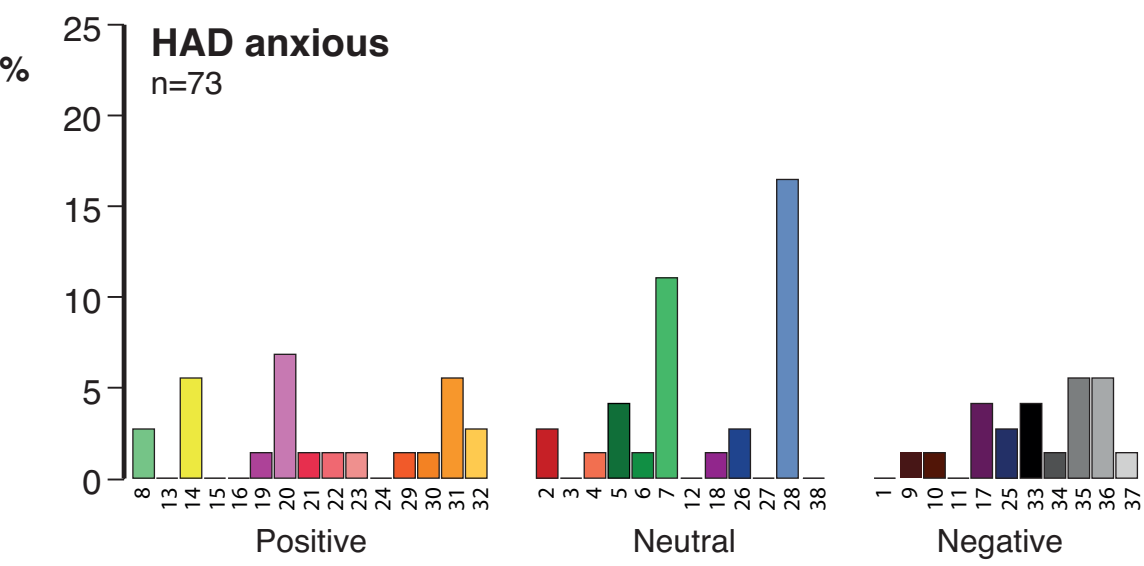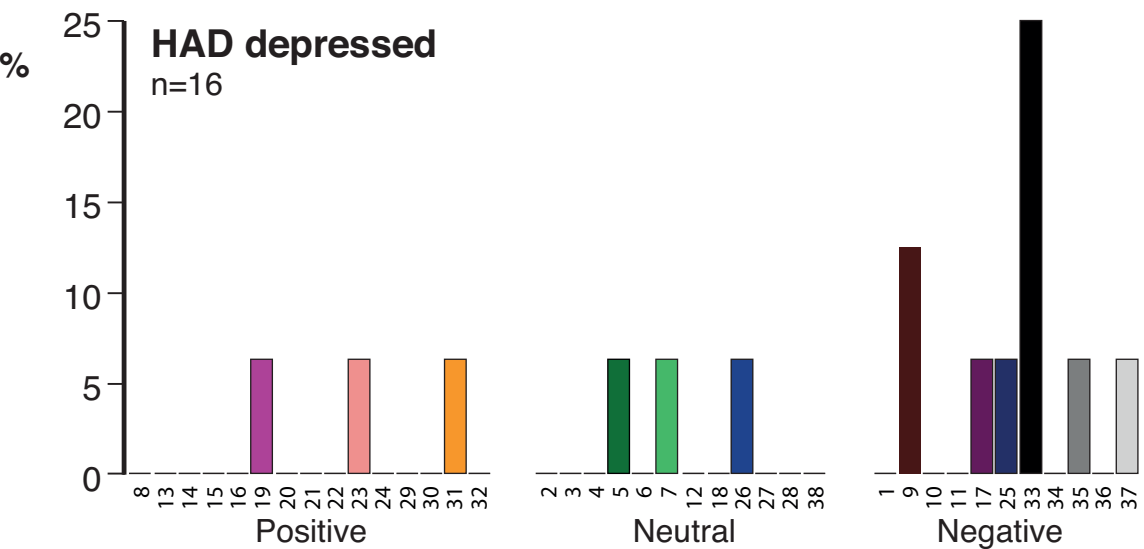

**Colour choice**

Supplement: MOESM3 [file 9432674]
